# Supplementary material for: Rationally introduce multi-competitive binding interactions in supramolecular gels: a simple and efficient approach to develop multi-analyte sensor array
Source: Royal Society of Chemistry journal article supplement (doi:10.1039/c6sc00955g), 2016-01-01
Supplement: c6sc00955g1.pdf [file c6sc00955g1.pdf]

## Electronic Supporting Information

### Rationally Introduce Multi-competitive Binding Interactions in Supramolecular Gels: A Simple and Efficient Approach to Develop Multi-analytes Sensor Array

Qi Lin\*, Tao-Tao Lu, Xin Zhu, Tai-Bao Wei, Hui Li, You-Ming Zhang\*

Key Laboratory of Eco-Environment-Related Polymer Materials, Ministry of Education of China, Key Laboratory of Polymer Materials of Gansu Province, College of Chemistry and Chemical Engineering, Northwest Normal University, Lanzhou, Gansu, 730070, P. R. China.

## Table of Contents

### Materials and instruments

**Scheme S1.** The synthesis of **G**

### Synthesis of gelator **G**

**Figure S1.** <sup>1</sup>H NMR Spectrum of **G**

**Figure S2.** <sup>13</sup>C NMR Spectrum of **G**

**Figure S3.** Mass Spectrum of **G**

**Table S1.** Gelation Property of Organogelator **G**

**Figure S4.** FT-IR spectra of (a) powder **G** and xerogel of organogel **OG**; (c) xerogel of **OG**, **OG+Fe<sup>3+</sup>** and **OG+Fe<sup>3+</sup>+HSO<sub>4</sub><sup>-</sup>**; (b) xerogel of **OG**, and xerogel **OG +CN<sup>-</sup>**.

**Figure S5.** Powder XRD patterns of powder and xerogel of **OG**.

**Figure S6.** SEM images of (a) **OG** xerogel; (b) **FeG** xerogel; (c) **FeG** xerogel treated with HSO<sub>4</sub><sup>-</sup> in situ.

**Figure S7.** Fluorescence spectra of organogel of **OG** (in gelled state) in n-butyl alcohol (0.8% w/v).

**Figure S8.** Photographs of organogel of **OG** in n-butyl alcohol (0.8% w/v) and organogels of **OG** in the presence of various metal ions (Mg<sup>2+</sup>, Ca<sup>2+</sup>, Cr<sup>3+</sup>, Fe<sup>3+</sup>, Co<sup>2+</sup>, Ni<sup>2+</sup>, Cu<sup>2+</sup>, Zn<sup>2+</sup>, Ag<sup>+</sup>, Cd<sup>2+</sup>, Hg<sup>2+</sup>, Pb<sup>2+</sup>, Ba<sup>2+</sup>, Sr<sup>2+</sup>, Al<sup>3+</sup>, La<sup>3+</sup>, Y<sup>3+</sup>, Ru<sup>3+</sup>, Eu<sup>3+</sup> and Tb<sup>3+</sup>, **G**: metal ions =2 : 1) under (a) nature light (b) UV light.

**Figure S9.** Fluorescence spectra of organogel of **OG** (in gelled state) in n-butyl alcohol (0.8% w/v) and organogels of **OG** in the presence of various metal ions (using their perchloric salts chlorized salts as the sources) added in 1 : 1 mol ratio with respect to **OG** (λ<sub>ex</sub> = 300 nm).

**Figure S10.** Fluorescence spectra of supramoleculargel based sensor (in gelled state) (a)**CuG**, (b)**CrG**, (c)**BaG** and (d)**AlG** in the presence of various anions (F<sup>-</sup>, Cl<sup>-</sup>, Br<sup>-</sup>, I<sup>-</sup>, AcO<sup>-</sup>, H<sub>2</sub>PO<sub>4</sub><sup>-</sup>, N<sub>3</sub><sup>-</sup>, SCN<sup>-</sup>, ClO<sub>4</sub><sup>-</sup>, S<sup>2-</sup> CN<sup>-</sup> H<sup>+</sup> and OH<sup>-</sup>); (e) **LaG**, (f) **EuG** and (g) **TbG** treated with OH<sup>-</sup>; (h) **AlFeG** and (i) **AlCuG** treated with CN<sup>-</sup>; (j) **AlCrG** treated with S<sup>2-</sup>; (k) **AlHgG** treated with Cl<sup>-</sup>; (l) **BaMgG** treated with I<sup>-</sup>; (m) **BaCaG** treated with HSO<sub>4</sub><sup>-</sup>; (n) **OG+CN<sup>-</sup>**

treated with  $\text{Fe}^{3+}$ ; (o) **OG** in the presence of various anions. ( $\lambda_{\text{ex}} = 300 \text{ nm}$ ).

**Figure S11.** Fluorescence spectra of supramolecular gel based sensors (in gelled state) with increasing concentration of guest ions: (a) **FeG** with  $\text{HSO}_4^-$ ; (b) **CuG** with  $\text{SCN}^-$ ; (c) **CrG** with  $\text{S}^{2-}$ ; (d) **BaG** with  $\text{F}^-$ ; (e) **AlG** with  $\text{HSO}_4^-$ ; (f) **AlFeG** with  $\text{CN}^-$ ; (g) **AlHgG** with  $\text{Cl}^-$ ; (h) **AlCrG** with  $\text{S}^{2-}$ ; (i) **AlCuG** with  $\text{CN}^-$ ; (j) **BaMgG** with  $\text{I}^-$ ; (k) **BaCaG** with  $\text{HSO}_4^-$ ; (l) **YG** with  $\text{Pb}^{2+}$ ; (m) **RuG** with  $\text{Al}^{3+}$ ; (n) **LaG** with  $\text{Hg}^{2+}$ ; (o) **EuG** with  $\text{Zn}^{2+}$ ; (p) **OG**+ $\text{CN}^-$  with  $\text{Fe}^{3+}$ ; (q) **OG**  $\text{CN}^-$ . ( $\lambda_{\text{ex}} = 300 \text{ nm}$ ).

**Figure S12.**  $^1\text{H}$  NMR spectra of (a) **G** ( $20 \text{ mg /ml}^{-1}$ ), (b) after addition of 0.5 equiv. of  $\text{CN}^-$  in  $\text{CDCl}_3$  (0.4ml) and  $d_6$ -DMSO (0.1ml); (c) 1 equiv. of  $\text{CN}^-$ ; (d) 2 equiv. of  $\text{CN}^-$ .

**Table S2.** Detection limits of the supramolecular based sensor array for target ions.

## Materials and instruments

All anions were used as the sodium salts while all cations were used as the perchlorate salts, which were purchased from Alfa Aesar and used as received. Fresh double distilled water was used throughout the experiment. Nuclear magnetic resonance (NMR) spectra were recorded on Varian Mercury 400 and Varian Inova 600 instruments. Mass spectra were recorded on a Bruker Esquire 6000 MS instrument. The X-ray diffraction analysis (XRD) was performed in a transmission mode with a Rigaku RINT2000 diffractometer equipped with graphite monochromated CuK $\alpha$  radiation ( $\lambda = 1.54073 \text{ \AA}$ ). The morphologies and sizes of the xerogels were characterized using field emission scanning electron microscopy (FE-SEM, JSM-6701F) at an accelerating voltage of 8 kV. The infrared spectra were performed on a Digilab FTS-3000 Fourier transform-infrared spectrophotometer. Melting points were measured on an X-4 digital melting-point apparatus (uncorrected). Fluorescence spectra were recorded on a Shimadzu RF-5301PC spectrofluorophotometer.

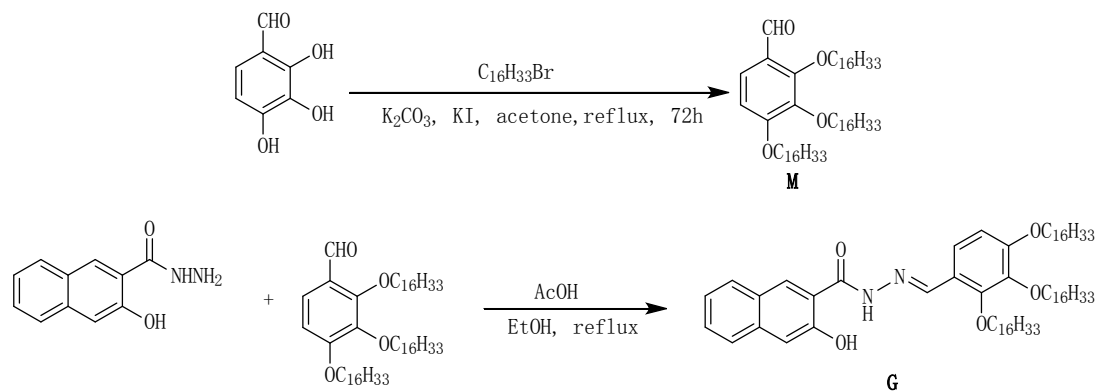

**Scheme S1.** The synthesis of **G**

## Synthesis of gelator **G**

**1. Synthesis of 2,3,4-tris-hexadecyloxy-benzaldehyde (M):** 2,3,4-trihydroxy-benzaldehyde (5 mmol, 0.77g), 1-bromo-hexadecane (16 mmol, 4.88 g),  $K_2CO_3$  (30 mmol, 4.14 g) and KI (2 mmol, 0.332 g) were added to 40 ml acetone. The reaction mixture was stirred under refluxing in nitrogen conditions for 36 hours. After removing the solvent, the precipitate was dissolved in  $CHCl_3$  and then being washed by  $H_2O$  and saturated sodium chloride aqueous solution successively. The product 2,3,4-tris-hexadecyloxy-benzaldehyde (**M**) was obtained after evaporating the solvent. (yield: 90%).  $^1H$  NMR ( $CDCl_3$ , 400 MHz):  $\delta$ , 10.26 (s, 1H, -CH=O), 7.57 (d, 1H,  $J = 8.0$  Hz, -ArH), 6.71 (d, 1H,  $J = 8.0$  Hz, -ArH), 3.97-4.17 (m, 6H, -OCH<sub>2</sub>), 1.74-1.87 (m, 6H, -CH<sub>2</sub>), 1.26-1.31 (m, 78H, -CH<sub>2</sub>), 0.88 (t,  $J = 8.0$  Hz, 9H, -CH<sub>3</sub>). MS-ESI calcd for  $C_{55}H_{103}O_4$  [**G** + H]<sup>+</sup>: 827.7800; found: 827.6445.

**2. Synthesis of gelator G:** 2,3,4-tris-hexadecyloxy-benzaldehyde (**M**) (1 mmol), 3-hydroxynaphthohydrazide (1 mmol) and glacial acetic acid (0.05 mmol, as a catalyst) were added to ethanol (15 mL). Then the reaction mixture was stirred under refluxed conditions for 24 hours, after removing the solvent, yielding the precipitate of **G** (yield, 79%).  $^1H$  NMR ( $CDCl_3$ , 400 MHz):  $\delta$ , 11.22 (s, 1H, -OH)  $\delta$ , 9.51 (s, 1H, -NH), 8.51 (s, 1H, -N=CH), 8.10 (s, 1H, -ArH), 7.80-7.79 (d, 1H,  $J = 4.0$  Hz, -ArH), 7.71-7.70 (d,  $J = 4.0$  Hz, 1H, -ArH), 7.58-7.56 (d,  $J = 8.0$  Hz, 1H, -ArH), 7.50-7.49 (d,  $J = 4.0$  Hz, 1H, -ArH), 7.34-7.36 (t,  $J = 8.0$  Hz, 1H, -ArH), 6.63-6.72 (m, 2H, -ArH), 4.18-3.97 (m, 6H, -OCH<sub>2</sub>), 1.85-1.75 (m, 6H, -OCH<sub>2</sub>CH<sub>2</sub>), 1.35-1.26 (m, 78H, -CH<sub>2</sub>), 0.89-0.87 (t,  $J = 8.0$  Hz, 9H, -CH<sub>3</sub>).  $^{13}C$ -NMR ( $CDCl_3$ , 100 MHz)  $\delta$ /ppm 153.0, 139.2, 128.6, 128.1, 126.9, 126.2, 124.4, 122.3, 108.51, 74.8, 73.7, 68.8, 31.9, 30.3, 29.7, 29.7, 29.7, 29.6, 29.5, 29.4, 29.4, 26.2, 26.1, 26.10, 26.1, 22.7, 14.1. IR (KBr, cm<sup>-1</sup>)  $\nu$ : 3202 (broad peak, O-H, N-H), 1649 (C=O), 1590 (C=N); MS-ESI calcd for  $C_{66}H_{111}N_2O_5$  [**G** + H]<sup>+</sup>: 1011.8488; found: 1011.6870.

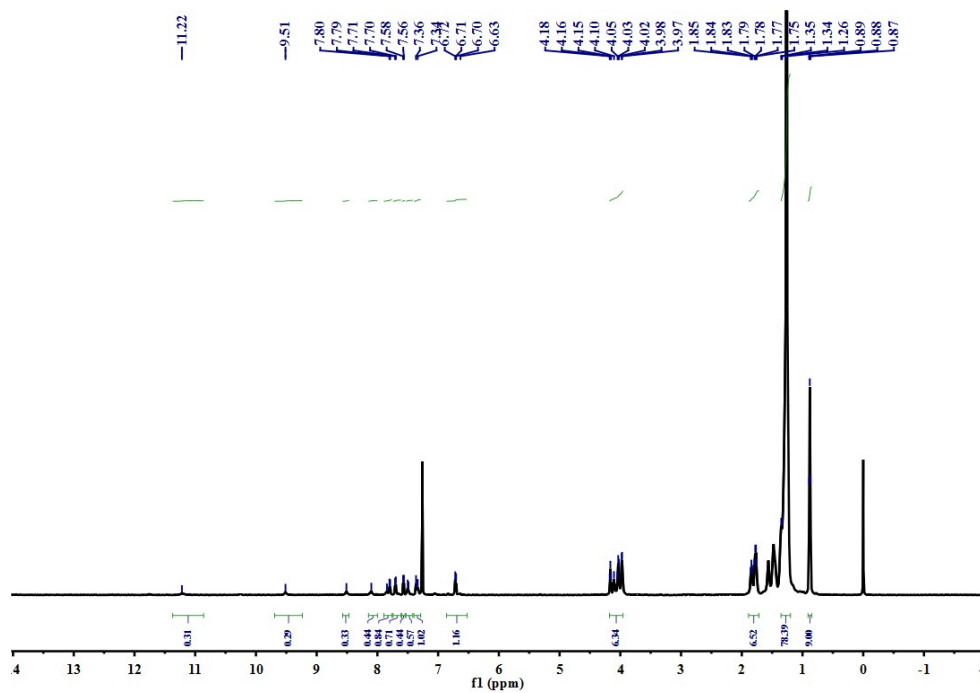

Figure S1. <sup>1</sup>H NMR Spectrum of G

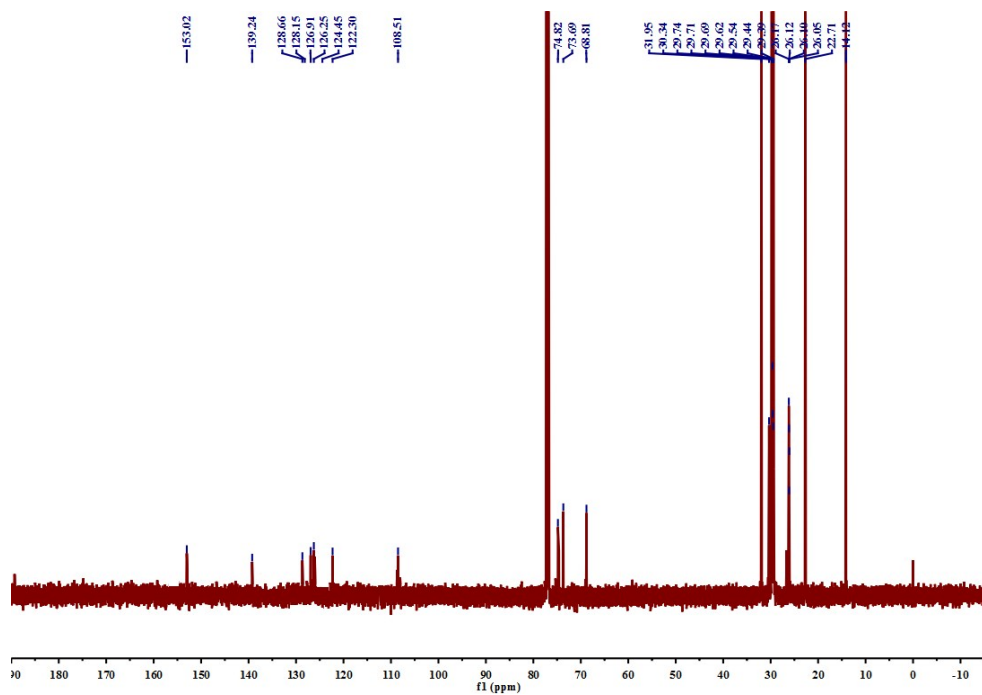

Figure S2. <sup>13</sup>C NMR Spectrum of G

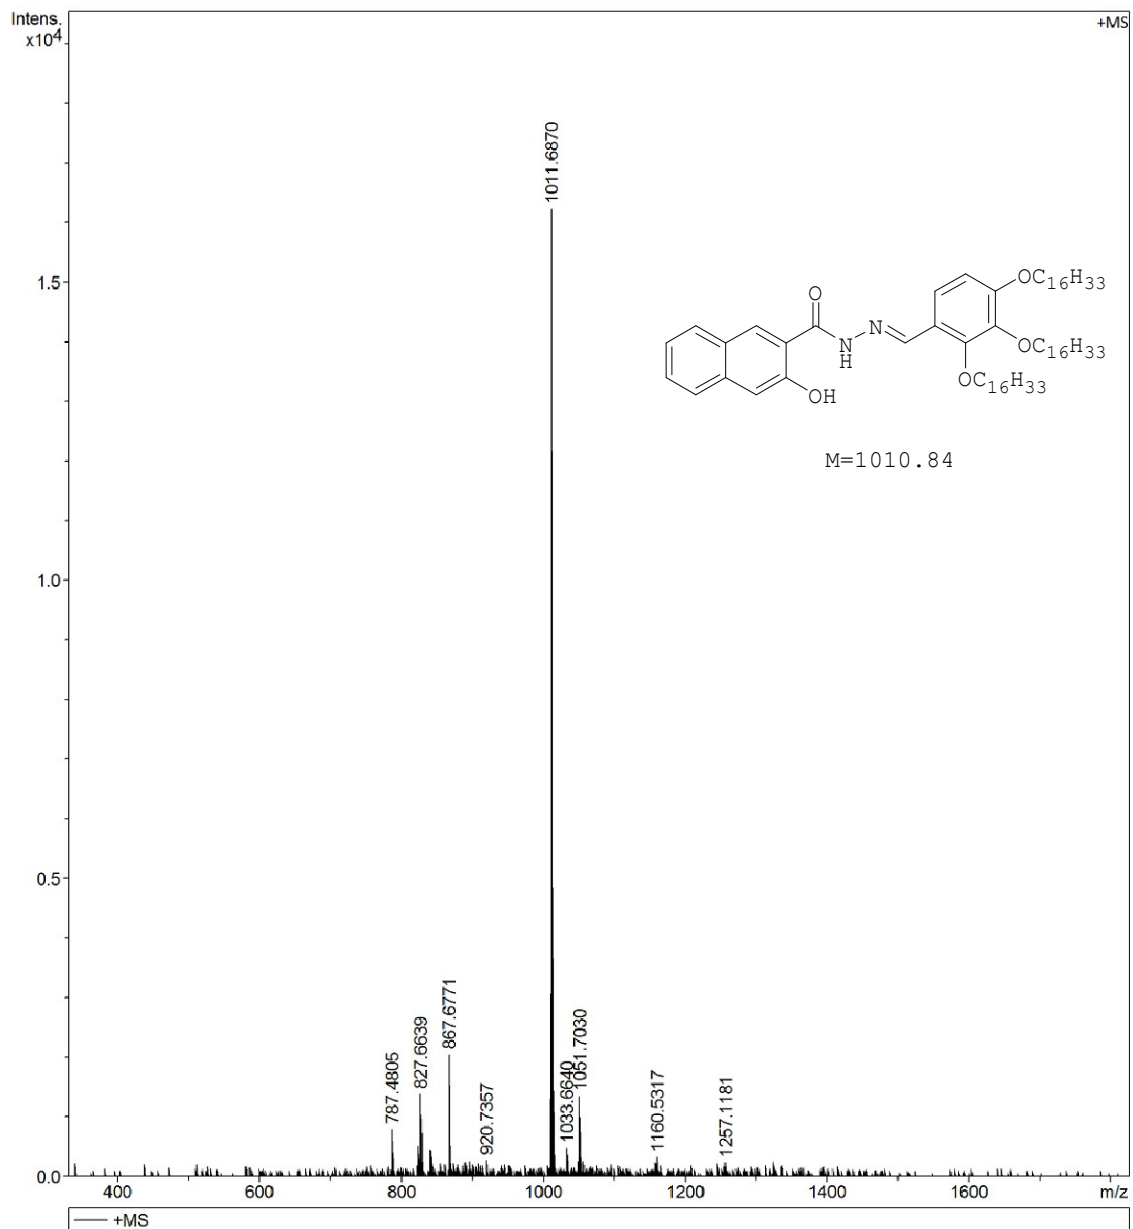

**Figure S3.** Mass Spectrum of G

**Table S1.** Gelation Property of Organogelator **G**.

| Entry | Solvent                              | State <sup>a</sup> | CGC <sup>b</sup> (%) | Tgel <sup>c</sup> (°C, wt%) |
|-------|--------------------------------------|--------------------|----------------------|-----------------------------|
| 1     | water                                | P                  | \                    | \                           |
| 2     | acetone                              | G                  | 1.5                  | \                           |
| 3     | methanol                             | P                  | \                    | \                           |
| 4     | ethanol                              | G                  | 2                    | 54(2.5 %)                   |
| 5     | isopropanol                          | G                  | 1                    | 50(1.5 %)                   |
| 6     | isopentanol                          | G                  | 0.8                  | 49(1%)                      |
| 7     | acetonitrile                         | P                  | \                    | \                           |
| 8     | THF                                  | S                  | \                    | \                           |
| 9     | DMF                                  | G                  | 1.5                  | 49(2 %)                     |
| 10    | DMSO                                 | G                  | 4                    | 48(4.5 %)                   |
| 11    | CCl <sub>4</sub>                     | G                  | 1                    | 52(1.5 %)                   |
| 12    | n-hexane                             | G                  | 1                    | 51(1.5 %)                   |
| 13    | ethanediol                           | P                  | \                    | \                           |
| 14    | benzene                              | S                  | \                    | \                           |
| 15    | CH <sub>2</sub> Cl <sub>2</sub>      | S                  | \                    | \                           |
| 16    | CHCl <sub>3</sub>                    | S                  | \                    | \                           |
| 17    | CH <sub>2</sub> ClCH <sub>2</sub> Cl | S                  | \                    | \                           |
| 18    | petroleum ether                      | G                  | 3                    | 52(3.5%)                    |
| 19    | ethyl acetate                        | G                  | 1                    | 48(1.5%)                    |
| 20    | n-propanol                           | G                  | 2                    | 55(2.5%)                    |
| 21    | n-butyl alcohol                      | G                  | 0.2                  | 47(0.6%)                    |
| 22    | n-amyl alcohol                       | G                  | 0.2                  | 48(0.6%)                    |
| 23    | cyclohexanol                         | G                  | 2                    | 50(2.5%)                    |
| 24    | n-hexanol                            | G                  | 1                    | 49(1.5%)                    |

<sup>a</sup>G, P and S denote gelation, precipitation and solution, respectively, c = 0.8%.

<sup>b</sup>The critical gelation concentration (wt%, 10mg/ml = 1.0%).

<sup>c</sup>The gelation temperature(°C).

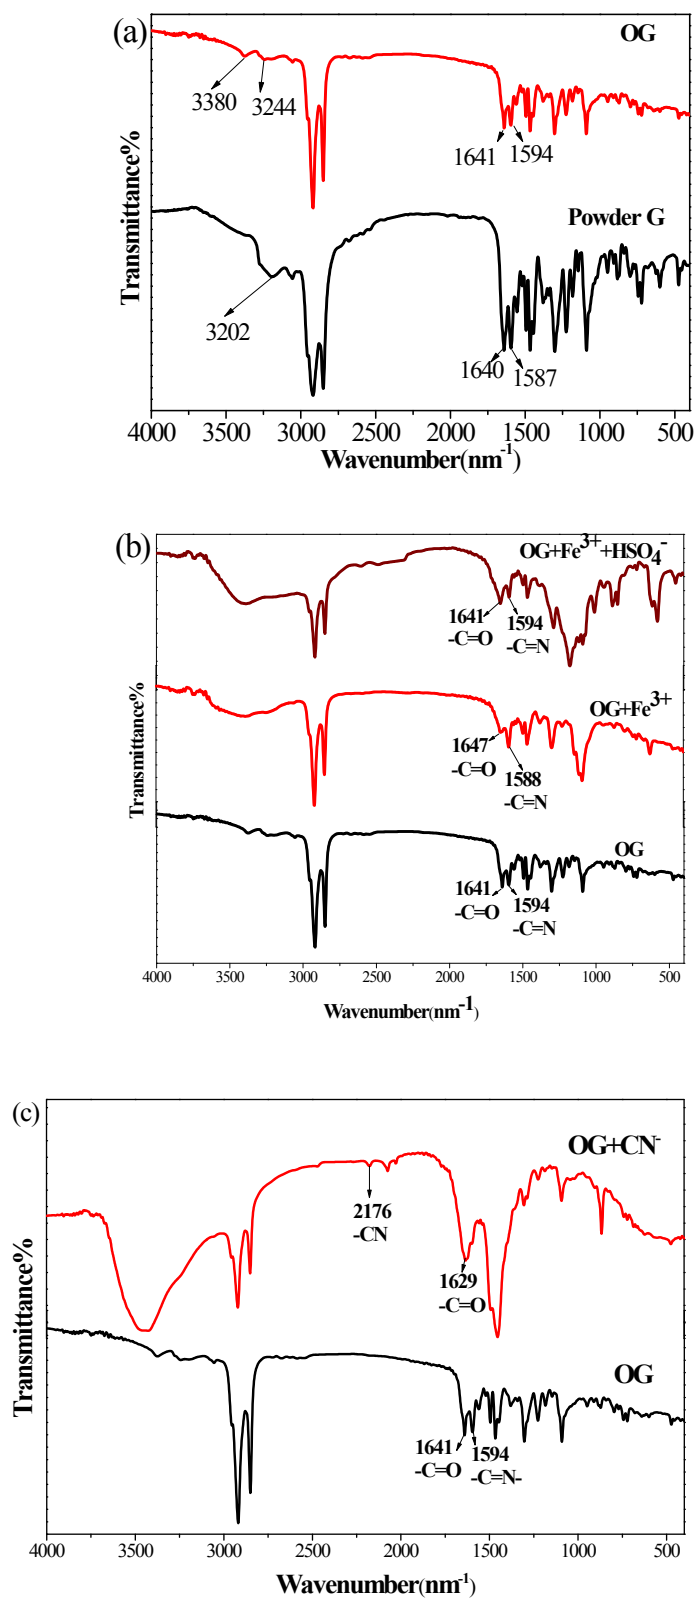

**Figure S4.** FT-IR spectra of (a) powder G and xerogel of organogel OG; (c) xerogel of OG, OG+Fe<sup>3+</sup> and OG+Fe<sup>3+</sup>+HSO<sub>4</sub><sup>-</sup>; (b) xerogel of OG, and xerogel OG +CN<sup>-</sup>.



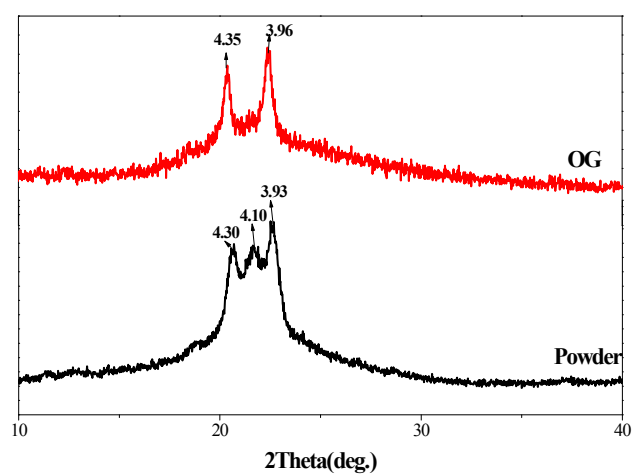

**Figure S5.** Powder XRD patterns of powder and xerogel of **OG**.

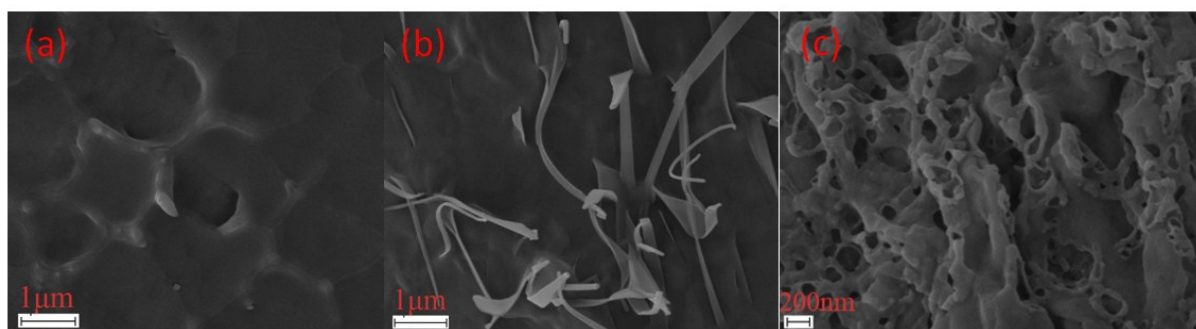

**Figure S6.** SEM images of (a) **OG** xerogel; (b) **FeG** xerogel; (c) **FeG** xerogel treated with HSO<sub>4</sub><sup>-</sup> in situ.

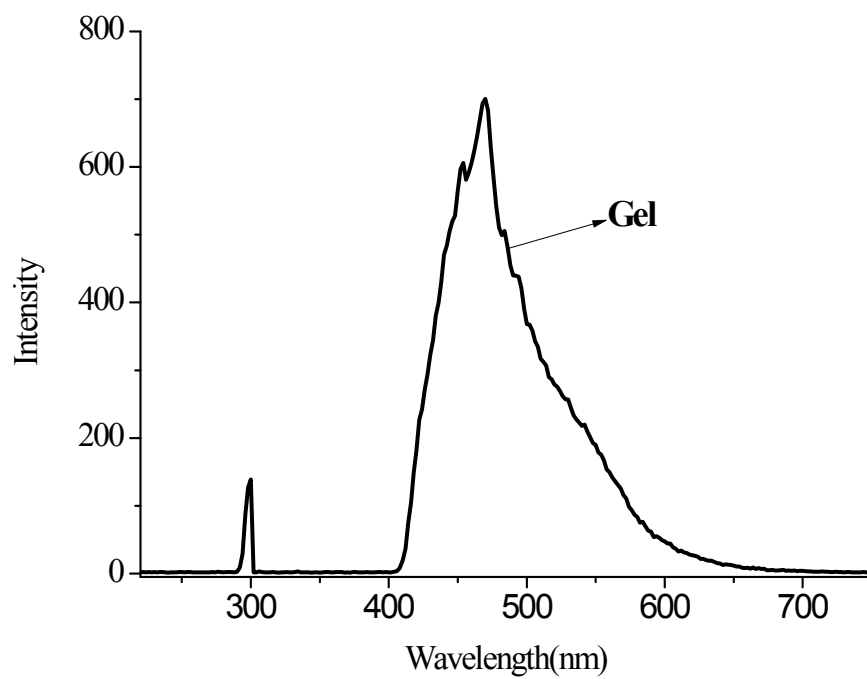

**Figure S7** Fluorescence spectra of organogel of **OG** (in gelled state) in n-butyl alcohol (0.8% w/v).

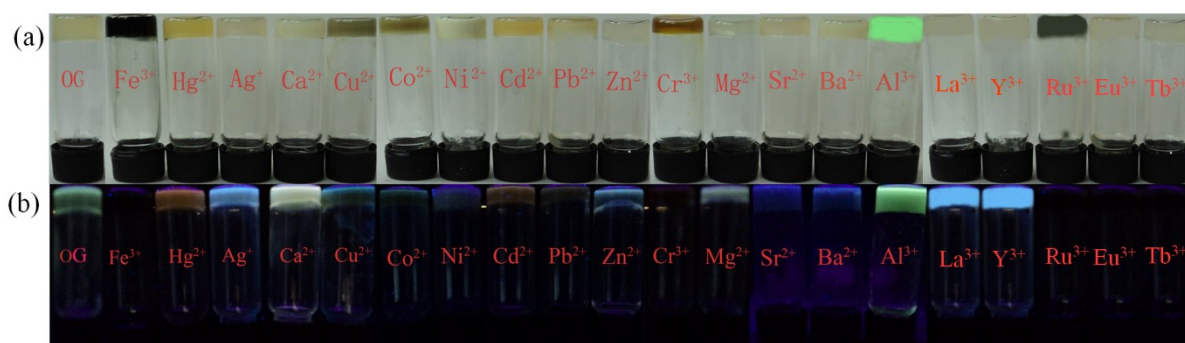

**Figure S8.** Photographs of organogel of **OG** in n-butyl alcohol (0.8% w/v) and organogels of **OG** in the presence of various metal ions ( $\text{Mg}^{2+}$ ,  $\text{Ca}^{2+}$ ,  $\text{Cr}^{3+}$ ,  $\text{Fe}^{3+}$ ,  $\text{Co}^{2+}$ ,  $\text{Ni}^{2+}$ ,  $\text{Cu}^{2+}$ ,  $\text{Zn}^{2+}$ ,  $\text{Ag}^+$ ,  $\text{Cd}^{2+}$ ,  $\text{Hg}^{2+}$ ,  $\text{Pb}^{2+}$ ,  $\text{Ba}^{2+}$ ,  $\text{Sr}^{2+}$ ,  $\text{Al}^{3+}$ ,  $\text{La}^{3+}$ ,  $\text{Y}^{3+}$ ,  $\text{Ru}^{3+}$ ,  $\text{Eu}^{3+}$  and  $\text{Tb}^{3+}$ , **G**: metal ions = 2 : 1) under (a) nature light (b) UV light.

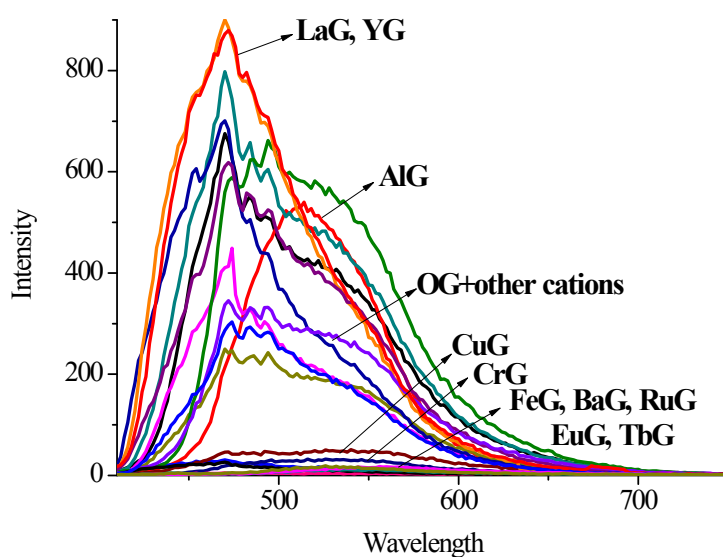

**Figure S9.** Fluorescence spectra of organogel of **OG** and **OG** (in gelled state) in the presence of various metal ions ( $\text{Mg}^{2+}$ ,  $\text{Ca}^{2+}$ ,  $\text{Cr}^{3+}$ ,  $\text{Fe}^{3+}$ ,  $\text{Co}^{2+}$ ,  $\text{Ni}^{2+}$ ,  $\text{Cu}^{2+}$ ,  $\text{Zn}^{2+}$ ,  $\text{Ag}^+$ ,  $\text{Cd}^{2+}$ ,  $\text{Hg}^{2+}$ ,  $\text{Pb}^{2+}$ ,  $\text{Ba}^{2+}$ ,  $\text{Sr}^{2+}$ ,  $\text{Al}^{3+}$ ,  $\text{La}^{3+}$ ,  $\text{Y}^{3+}$ ,  $\text{Ru}^{3+}$ ,  $\text{Eu}^{3+}$  and  $\text{Tb}^{3+}$ , **G**: metal ions = 2 : 1). ( $\lambda_{\text{ex}} = 300 \text{ nm}$ ).

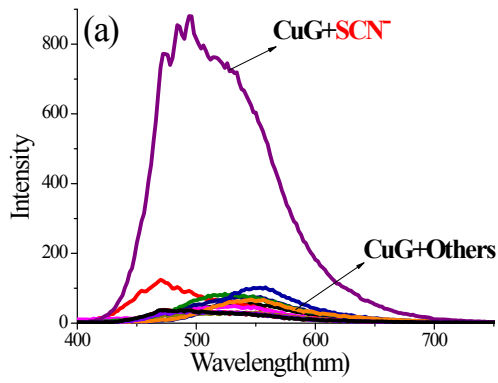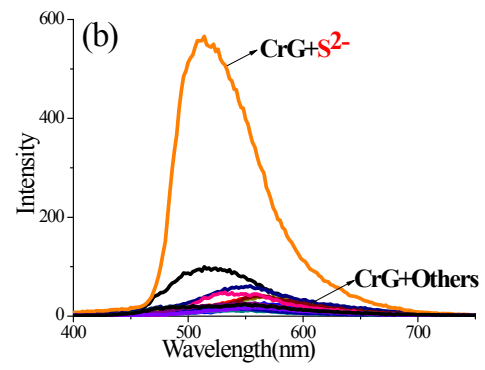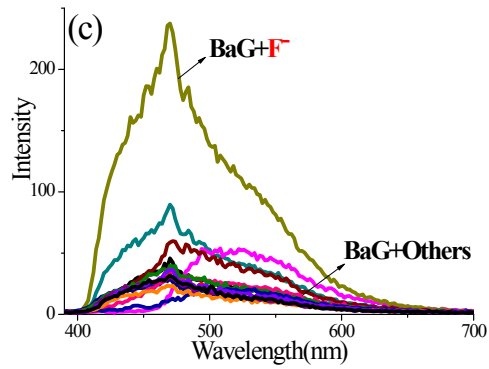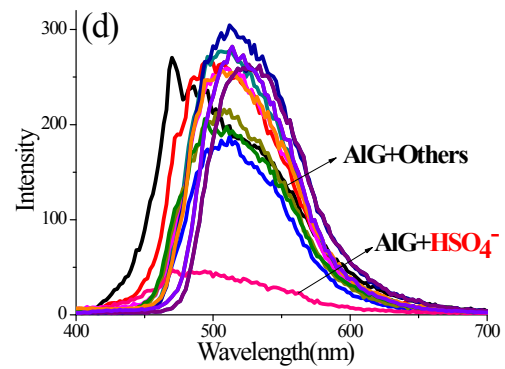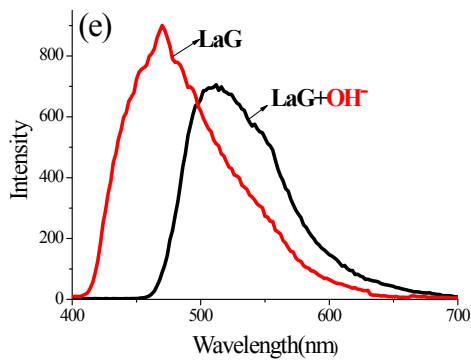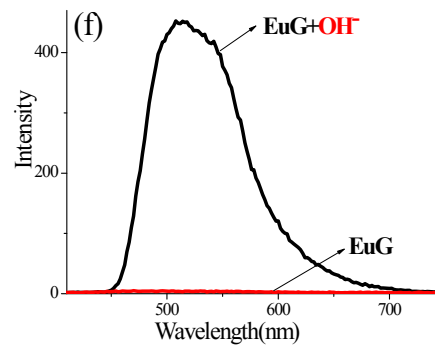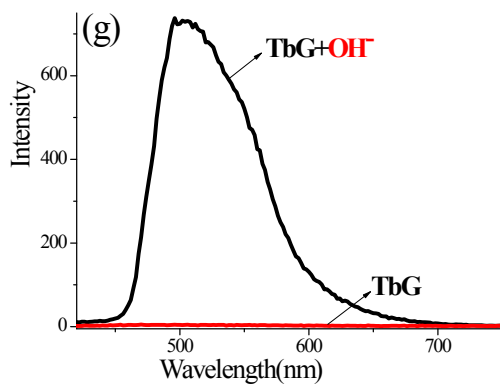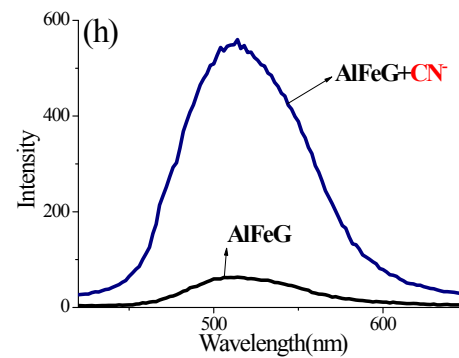

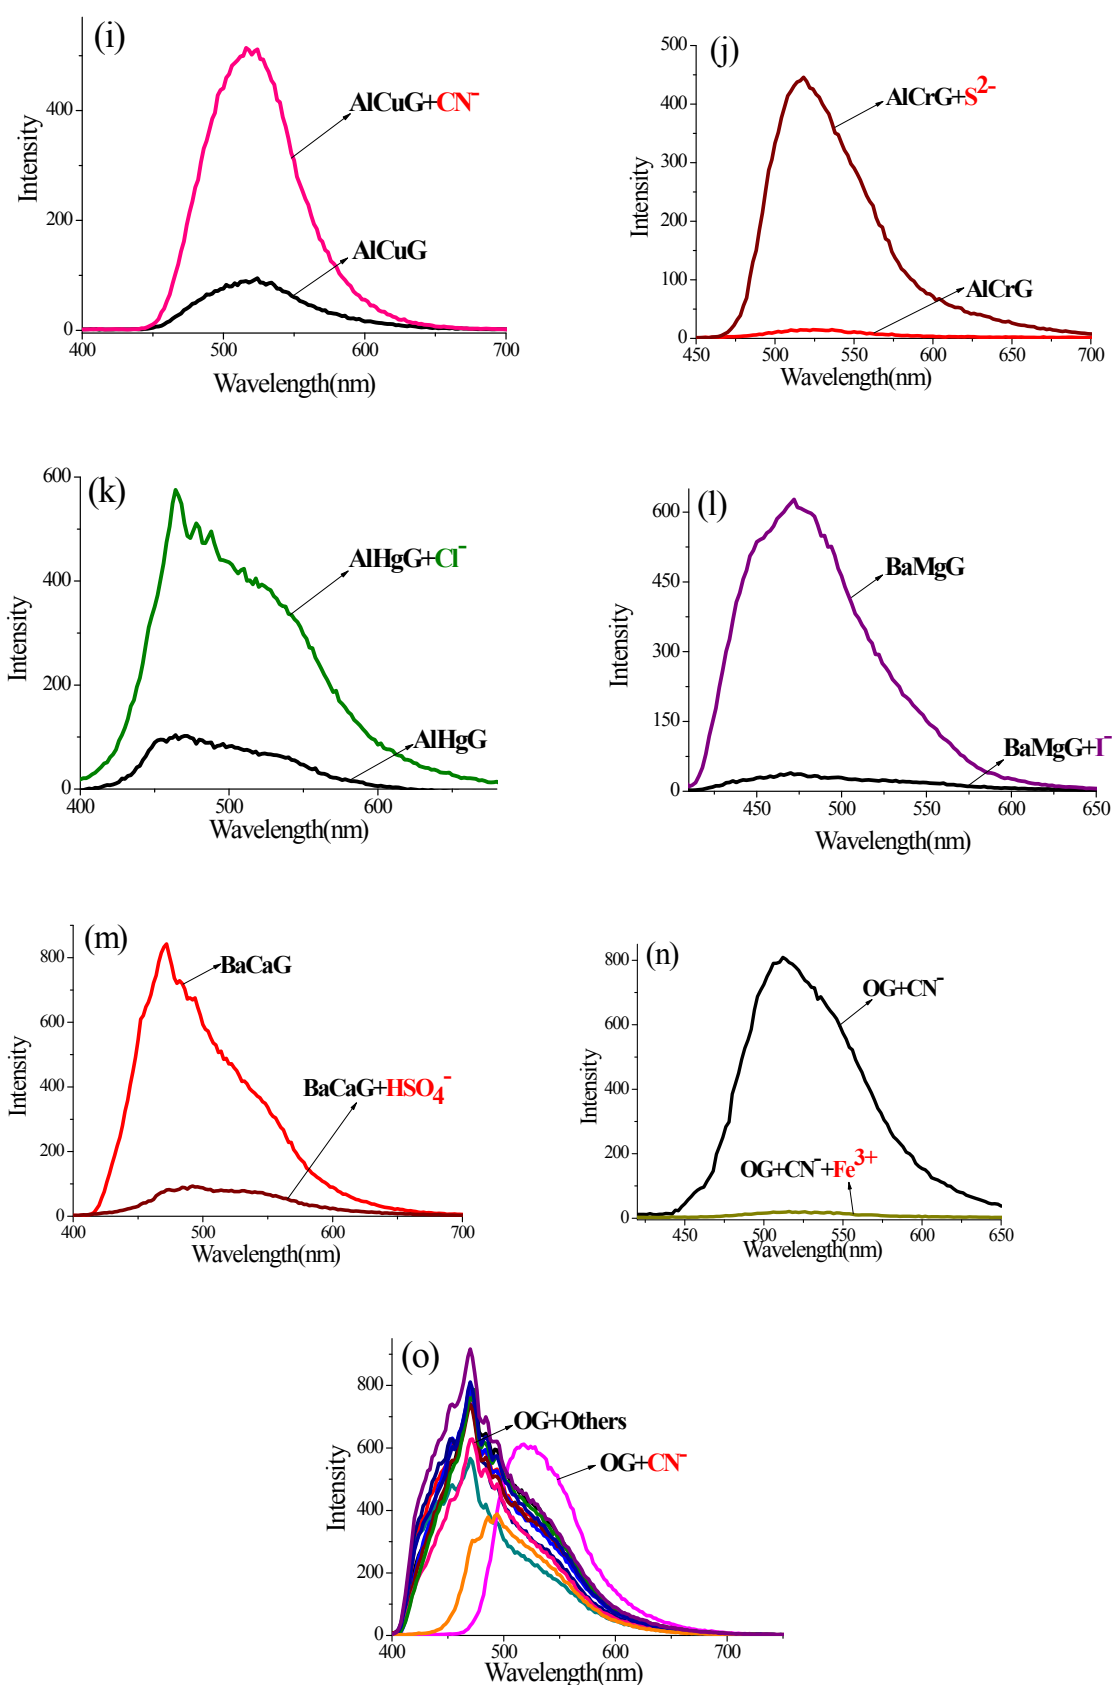

**Figure S10.** Fluorescence spectra of supramolecular gels based sensor (in gelled state) (a)CuG, (b)CrG, (c)BaG and (d)AIG in the presence of various anions ( $F^-$ ,  $Cl^-$ ,  $Br^-$ ,  $I^-$ ,  $AcO^-$ ,  $H_2PO_4^-$ ,  $N_3^-$ ,  $SCN^-$ ,  $ClO_4^-$ ,  $S^{2-}$ ,  $CN^-$ ,  $H^+$  and  $OH^-$ ); (e) LaG, (f) EuG and (g) TbG treated with  $OH^-$ ; (h) AlFeG and (i) AICuG treated with  $CN^-$ ; (j) AICrG treated with  $S^{2-}$ ; (k) AlHgG treated with  $Cl^-$ ; (l) BaMgG treated with  $I^-$ ; (m) BaCaG treated with  $HSO_4^-$ ; (n) OG+ $CN^-$  treated with  $Fe^{3+}$ ; (o) OG in the presence of various anions. ( $\lambda_{ex} = 300\text{ nm}$ ).

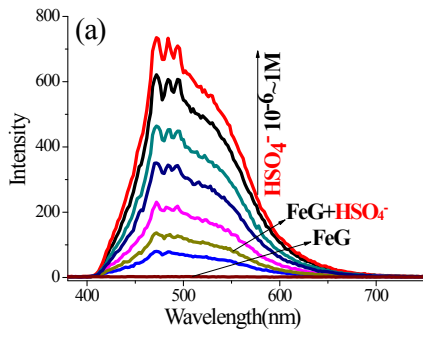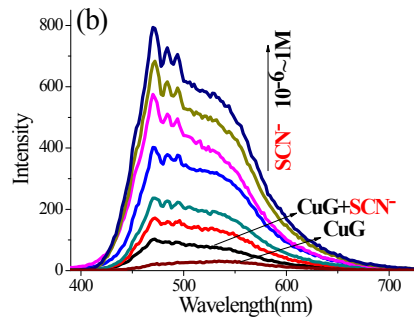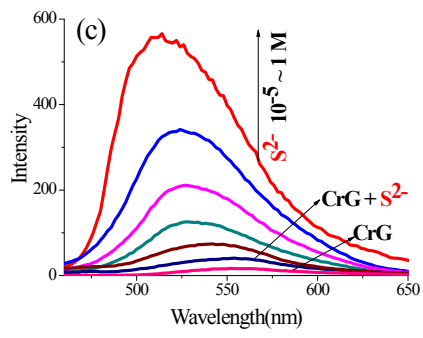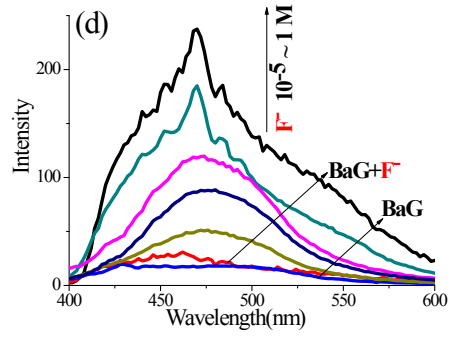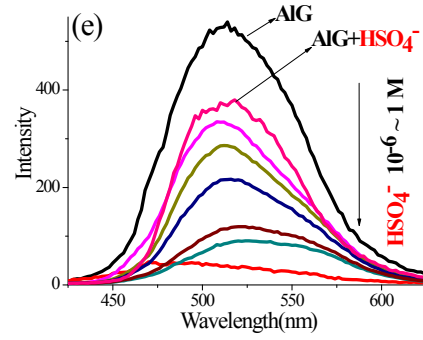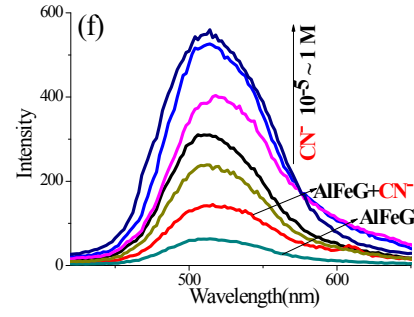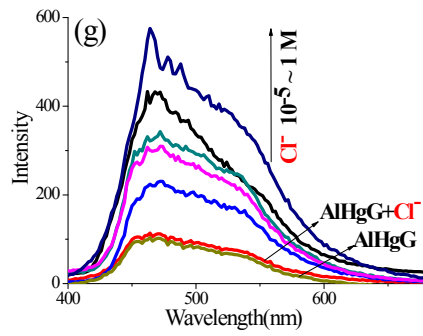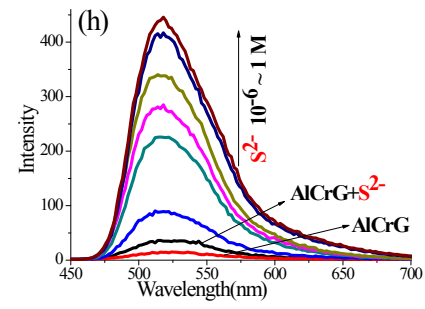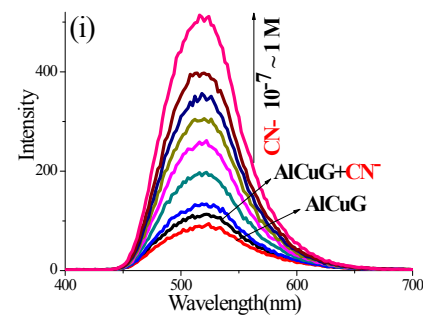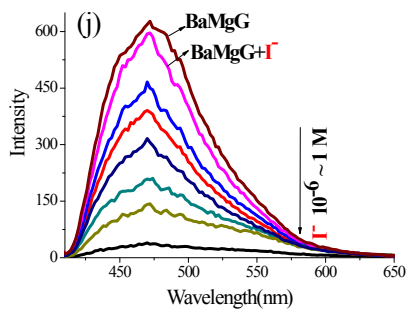

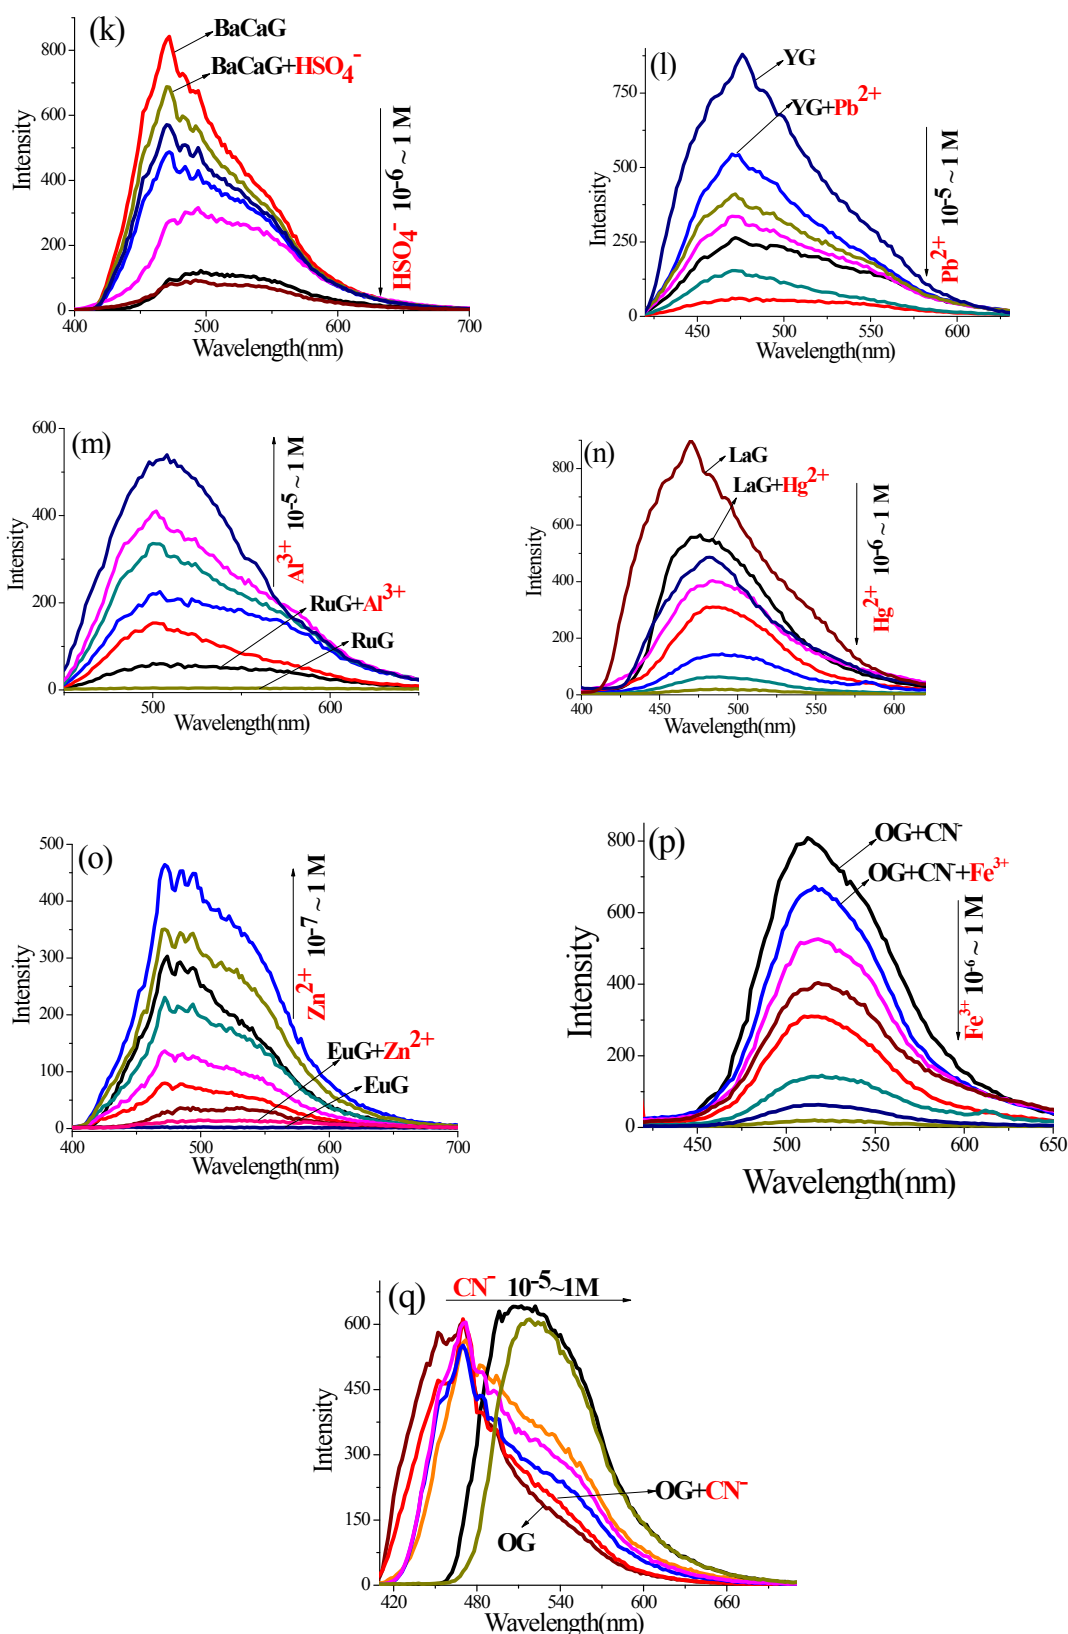

**Figure S11.** Fluorescence spectra of supramolecular gel based sensors (in gelled state) with increasing concentration of guest ions: (a) **FeG** with **HSO<sub>4</sub><sup>-</sup>**; (b) **CuG** with **SCN<sup>-</sup>**; (c) **CrG** with **S<sup>2-</sup>**; (d) **BaG** with **F<sup>-</sup>**; (e) **AlG** with **HSO<sub>4</sub><sup>-</sup>**; (f) **AlFeG** with **CN<sup>-</sup>**; (g) **AlHgG** with **Cl<sup>-</sup>**; (h) **AlCrG** with **S<sup>2-</sup>**; (i) **AlCuG** with **CN<sup>-</sup>**; (j) **BaMgG** with **I<sup>-</sup>**; (k) **BaCaG** with **HSO<sub>4</sub><sup>-</sup>**; (l) **YG** with **Pb<sup>2+</sup>**; (m) **RuG** with **Al<sup>3+</sup>**; (n) **LaG** with **Hg<sup>2+</sup>**; (o) **EuG** with **Zn<sup>2+</sup>**; (p) **OG+CN<sup>-</sup>** with **Fe<sup>3+</sup>**; (q) **OG+CN<sup>-</sup>**. ( $\lambda_{\text{ex}} = 300 \text{ nm}$ ).

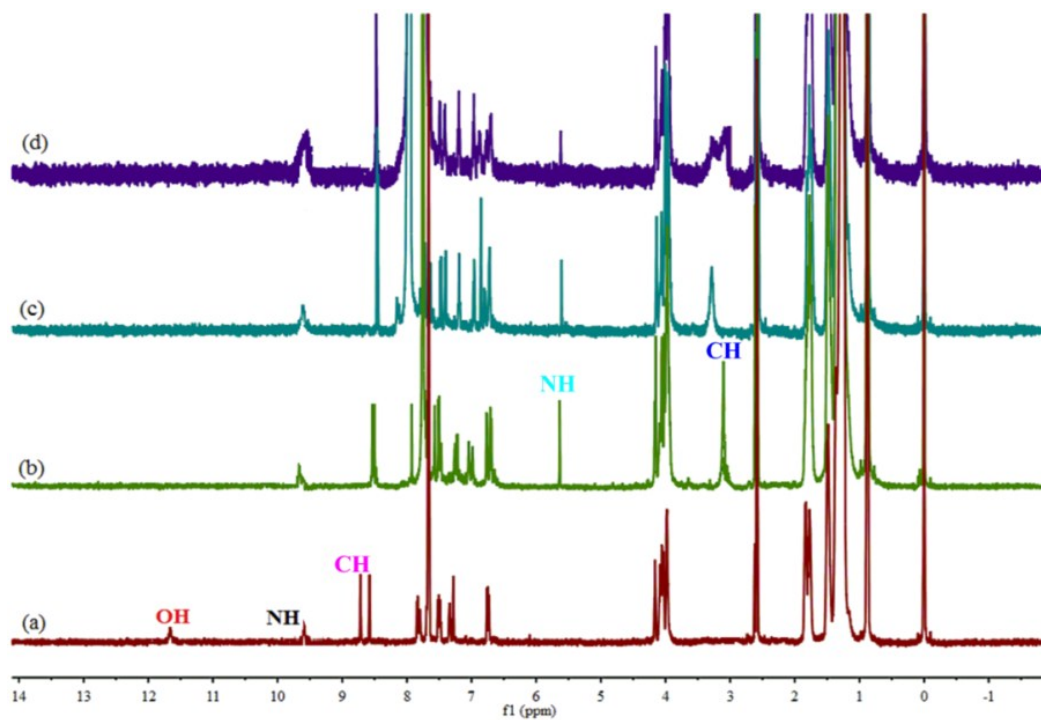

**Figure S12** <sup>1</sup>H NMR spectra of (a) **G** (20 mg /ml<sup>-1</sup>), (b) after addition of 0.5 equiv. of CN<sup>-</sup> in CDCl<sub>3</sub> (0.4ml ) and d<sub>6</sub>-DMSO (0.1ml); (c) 1 equiv. of CN<sup>-</sup>; (d) 2 equiv. of CN<sup>-</sup>.



**Table S2.** Detection limits of the supramolecular based sensor array for target ions.

| sensor                   | ions                          | detection limits/M <sup>-1</sup> |
|--------------------------|-------------------------------|----------------------------------|
| <b>OG</b>                | CN <sup>-</sup>               | 10 <sup>-5</sup>                 |
| <b>FeG</b>               | HSO <sub>4</sub> <sup>-</sup> | 10 <sup>-6</sup>                 |
| <b>CuG</b>               | SCN <sup>-</sup>              | 10 <sup>-6</sup>                 |
| <b>CrG</b>               | S <sup>2-</sup>               | 10 <sup>-5</sup>                 |
| <b>BaG</b>               | F <sup>-</sup>                | 10 <sup>-5</sup>                 |
| <b>AlG</b>               | HSO <sub>4</sub> <sup>-</sup> | 10 <sup>-6</sup>                 |
| <b>AlFeG</b>             | CN <sup>-</sup>               | 10 <sup>-5</sup>                 |
| <b>AlHgG</b>             | Cl <sup>-</sup>               | 10 <sup>-5</sup>                 |
| <b>AlCuG</b>             | CN <sup>-</sup>               | 10 <sup>-7</sup>                 |
| <b>AlCrG</b>             | S <sup>2-</sup>               | 10 <sup>-6</sup>                 |
| <b>BaMgG</b>             | I <sup>-</sup>                | 10 <sup>-6</sup>                 |
| <b>BaGaG</b>             | HSO <sub>4</sub> <sup>-</sup> | 10 <sup>-6</sup>                 |
| <b>OG+CN<sup>-</sup></b> | Fe <sup>3+</sup>              | 10 <sup>-6</sup>                 |
| <b>LaG</b>               | Hg <sup>2+</sup>              | 10 <sup>-6</sup>                 |
| <b>YG</b>                | Pb <sup>2+</sup>              | 10 <sup>-5</sup>                 |
| <b>RuG</b>               | Al <sup>3+</sup>              | 10 <sup>-5</sup>                 |
| <b>EuG</b>               | Zn <sup>2+</sup>              | 10 <sup>-7</sup>                 |
